# Supplementary material for: Haemodynamic left‐ventricular changes during dobutamine stress in patients with atrial septal defect assessed with magnetic resonance imaging‐based pressure–volume loops
Source: PubMed Central journal article supplement (PMC9796342; doi:10.1111/cpf.12781), 2022-07-26

**Stroke work (J)**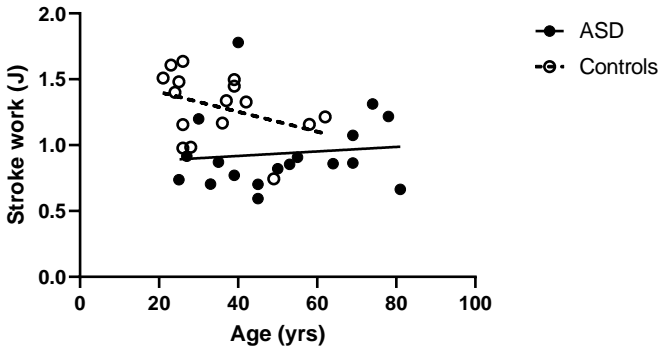**Potential energy (J)**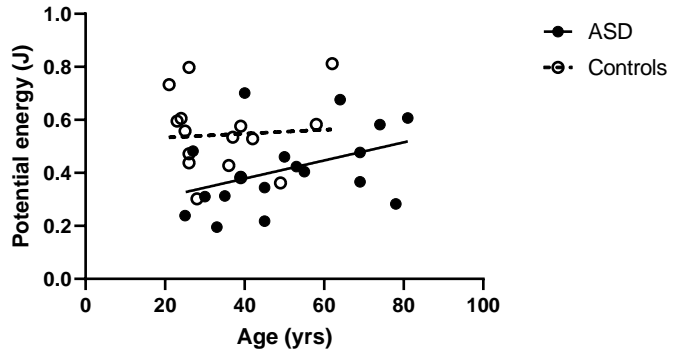**Ventricular efficiency (%)**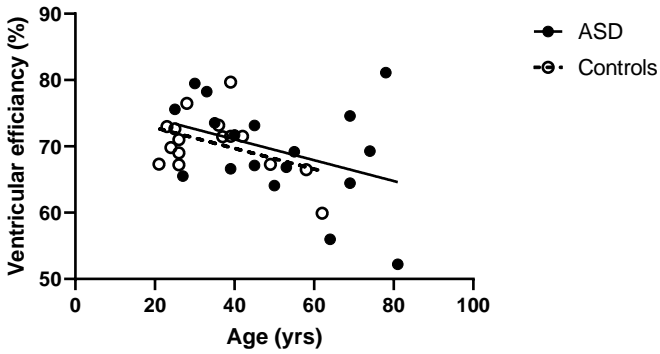**External power (J/s)**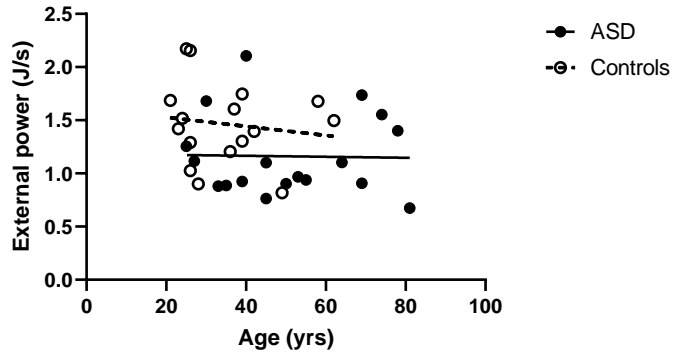**Contractility (mmHg/ml)**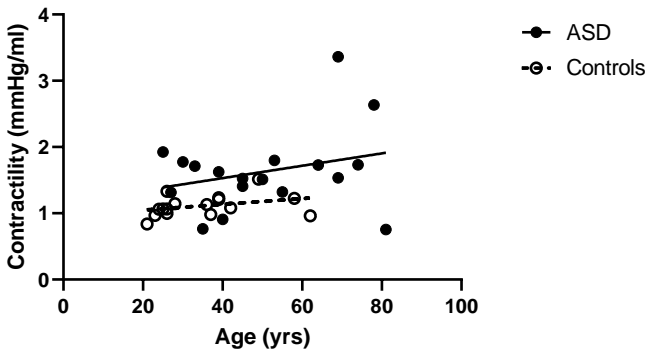**Energy per ejected volume (J/ml)**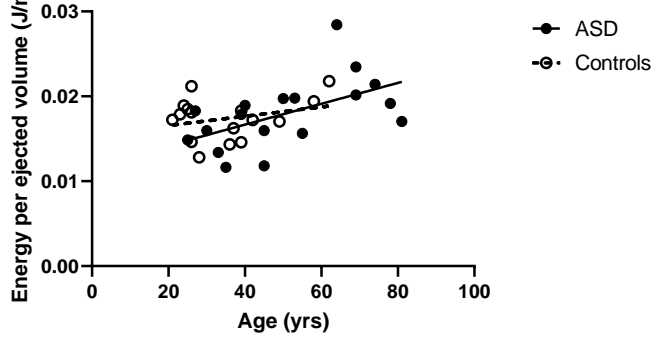**Ea/Emax**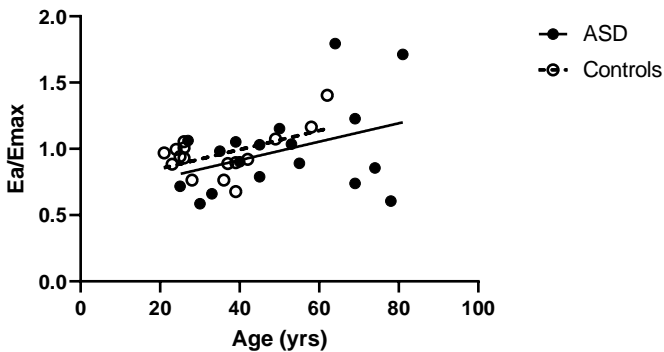**Ea (mmHg/ml)**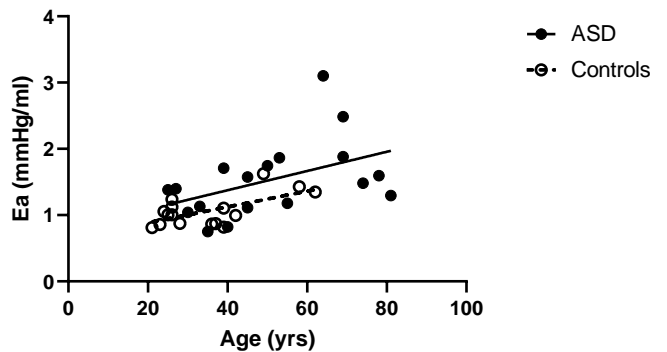

Supplement: CPF-42-422-s001.pdf [file CPF-42-422-s001.pdf]
