# Supplementary material for: Haemodynamic left‐ventricular changes during dobutamine stress in patients with atrial septal defect assessed with magnetic resonance imaging‐based pressure–volume loops
Source: PubMed Central journal article supplement (PMC9796342; doi:10.1111/cpf.12781), 2022-07-26

Stroke work (J)

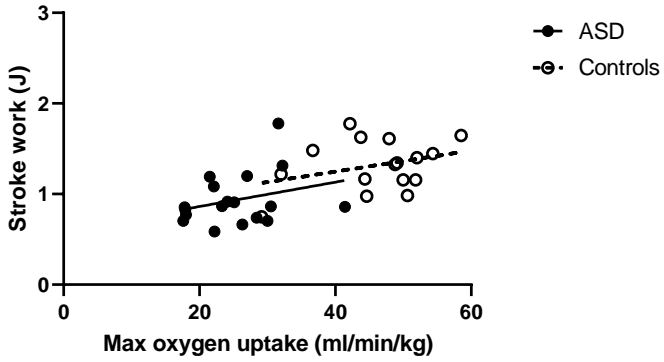

Potential energy (J)

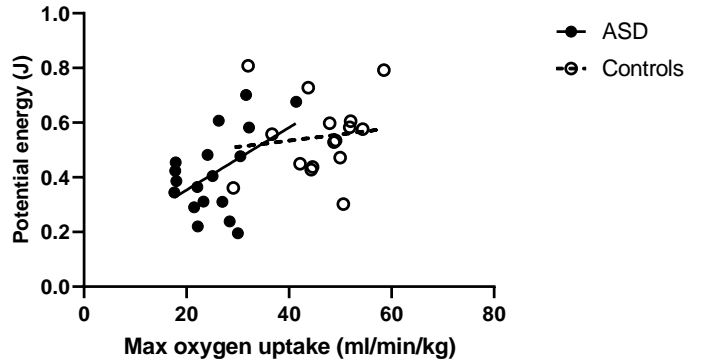

Ventricular efficiency (%)

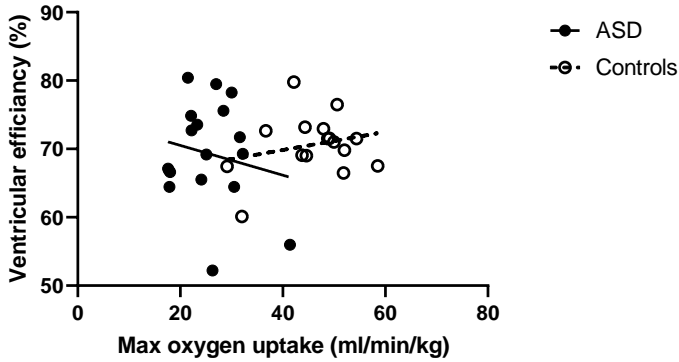

External power (J/s)

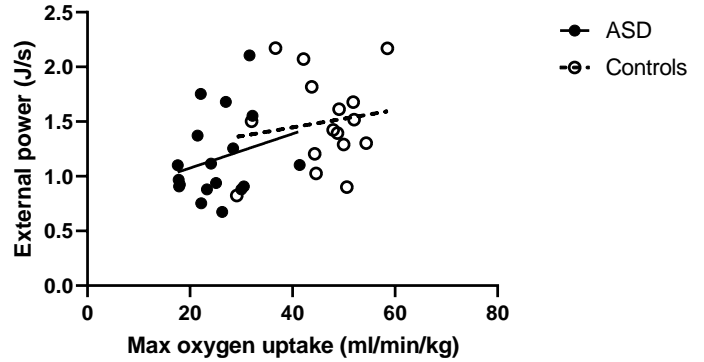

Contractility (mmHg/ml)

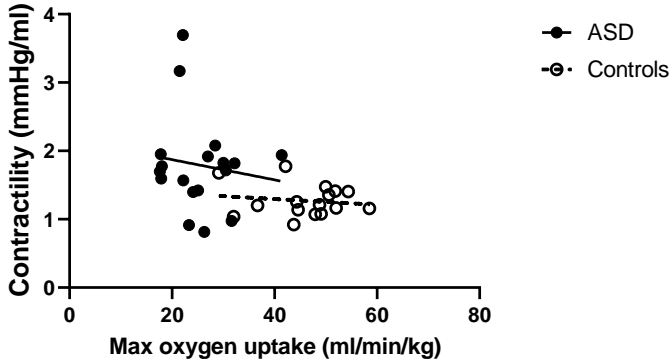

Energy per ejected volume (J/ml)

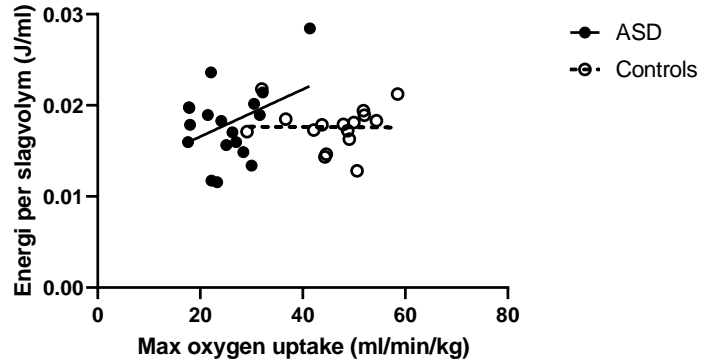

Ea/E<sub>max</sub>

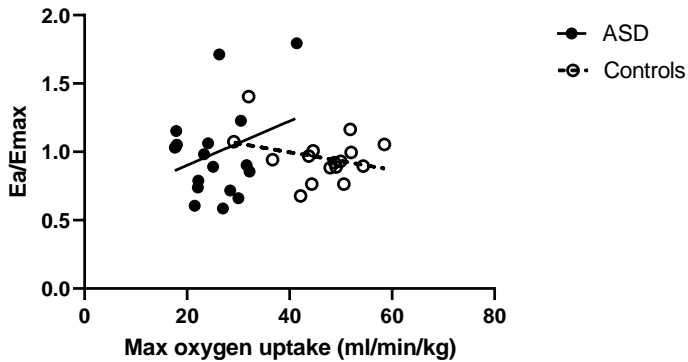

Ea (mmHg/ml)

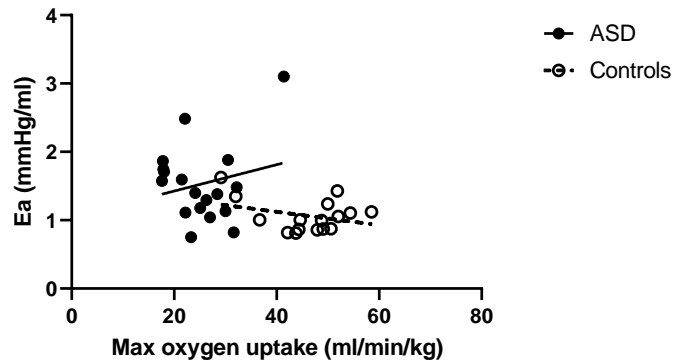

Supplement: CPF-42-422-s002.pdf [file CPF-42-422-s002.pdf]
