# Supplementary material for: Haemodynamic left‐ventricular changes during dobutamine stress in patients with atrial septal defect assessed with magnetic resonance imaging‐based pressure–volume loops
Source: PubMed Central journal article supplement (PMC9796342; doi:10.1111/cpf.12781), 2022-07-26
Supplement: CPF-42-422-s003.pdf [file CPF-42-422-s003.pdf]

Figure S1. Correlation between age and hemodynamic parameters There was a correlation between age and Ea and Ea/Emax in controls ( $r=0.63$ ,  $p<0.01$  and  $r=0.53$ ,  $p=0.034$ ), but not in patients ( $r=0.46$ ,  $p=0.055$  and  $r=0.38$ ,  $p=0.12$ ). There was a correlation between age and energy per ejected volume in ASD patients ( $r=0.54$ ,  $p=0.02$ ) but not in controls ( $r=0.28$ ,  $p=0.29$ ). No other parameter correlated with age in either ASD patients (stroke work:  $r=0.11$ ,  $p=0.67$ ; potential energy:  $r=0.41$ ,  $p=0.091$ ; ventricular efficiency:  $r=-0.37$ ,  $p=0.13$ ; external power:  $r=0.02$ ,  $p=0.93$ ; contractility:  $r=0.27$ ,  $p=0.27$ ) or patients (stroke work:  $r=0.38$ ,  $p=0.15$ ; potential energy:  $r=0.06$ ,  $p=0.82$ ; ventricular efficiency:  $r=-0.44$ ,  $p=0.090$ ; external power:  $r=0.14$ ,  $p=0.61$ ; contractility:  $r=0.33$ ,  $p=0.21$ )

Figure S2. Correlation between peak VO<sub>2</sub> and hemodynamic parameters Potential energy correlated with peak VO<sub>2</sub> in patients ( $r=0.48$ ,  $p=0.046$ ) but not in controls ( $r=0.13$ ,  $p=0.64$ ). Peak VO<sub>2</sub> did not correlate with any other PV-loop derived parameters either in patients (stroke work:  $r=0.29$ ,  $p=0.24$ ; ventricular efficiency:  $r=-0.18$ ,  $p=0.47$ ; external power:  $r=0.25$ ,  $p=0.31$ ; contractility:  $r=0.13$ ,  $p=0.60$ ; energy per ejected volume:  $r=0.39$ ,  $p=0.11$ ; Ea:  $r=0.21$ ,  $p=0.40$ ; Ea/Emax:  $r=0.30$ ,  $p=0.22$ ) or in controls (stroke work:  $r=0.32$ ,  $p=0.22$ ; ventricular efficiency:  $r=0.24$ ,  $p=0.37$ ; external power:  $r=0.15$ ,  $p=0.58$ ; contractility:  $r=0.14$ ,  $p=0.60$ ; energy per ejected volume:  $r=0.010$ ,  $p=0.97$ ; Ea:  $r=-0.32$ ,  $p=0.22$ ; Ea/Emax:  $r=0.30$ ,  $p=0.26$ ).

Figure S3. Correlation between ASD size and hemodynamic parameters There was a correlation between the ASD size and stroke work ( $r=-0.53$ ,  $p=0.03$ , but no correlations between potential energy ( $r=-0.12$ ,  $p=0.65$ ), ventricular efficiency ( $r=-0.33$ ,  $p=0.19$ ), external power ( $r=-0.43$ ,  $p=0.08$ ), contractility ( $r=0.15$ ,  $p=0.57$ ) or energy per ejected volume ( $r=0.16$ ,  $p=0.54$ )

Figure S4. Correlation between peak VO<sub>2</sub> and hemodynamic parameters' change from rest to stress Peak VO<sub>2</sub> did not correlate with the change from rest to stress regarding any of the PV-loop derived parameters either in ASD patients (stroke work:  $r=-0.19$ ,  $p=0.48$ ; potential energy:  $r=0.27$ ,  $p=0.31$ ; ventricular efficiency:  $r=-0.39$ ,  $p=0.14$ ; external power:  $r=0.30$ ,  $p=0.26$ ; contractility:  $r=0.079$ ,  $p=0.77$ ; energy per ejected volume:  $r=0.027$ ,  $p=0.92$ ; Ea:  $r=0.17$ ,  $p=-0.53$ ; Ea/Emax:  $r=0.23$ ,  $p=0.37$ ) or in controls (stroke work:  $r=0.28$ ,  $p=0.30$ ; potential energy:  $r=0.29$ ,  $p=0.27$ ; ventricular efficiency:  $r=-0.23$ ,  $p=0.38$ ; external power:  $r=-0.057$ ,  $p=0.84$ ; contractility:  $r=0.45$ ,  $p=0.078$ ; energy per ejected volume:  $r=0.0008$ ,  $p=1.0$ ; Ea:  $r=-0.15$ ,  $p=0.57$ ; Ea/Emax:  $r=0.066$ ,  $p=0.81$ )
