# Supplementary material for: Haemodynamic left‐ventricular changes during dobutamine stress in patients with atrial septal defect assessed with magnetic resonance imaging‐based pressure–volume loops
Source: PubMed Central journal article supplement (PMC9796342; doi:10.1111/cpf.12781), 2022-07-26

**Stoke work**

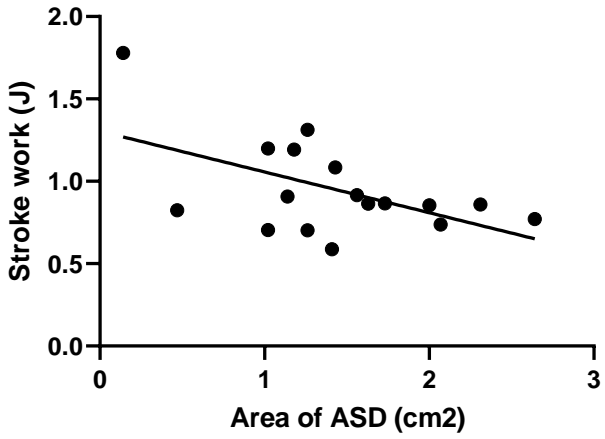

**Potential energy**

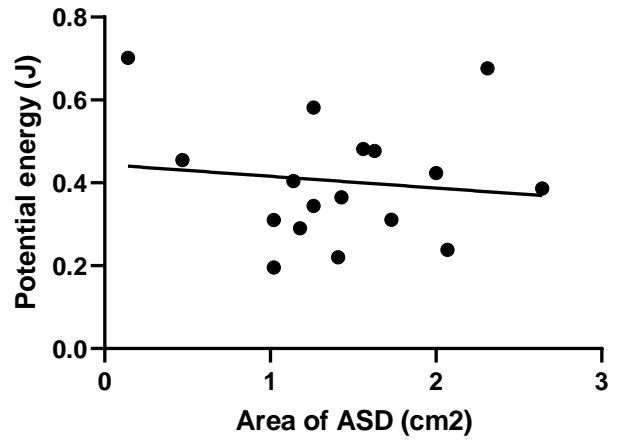

**Ventricular efficiency**

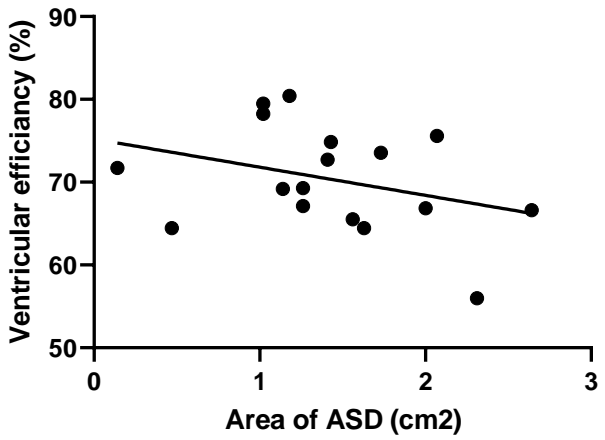

**External power**

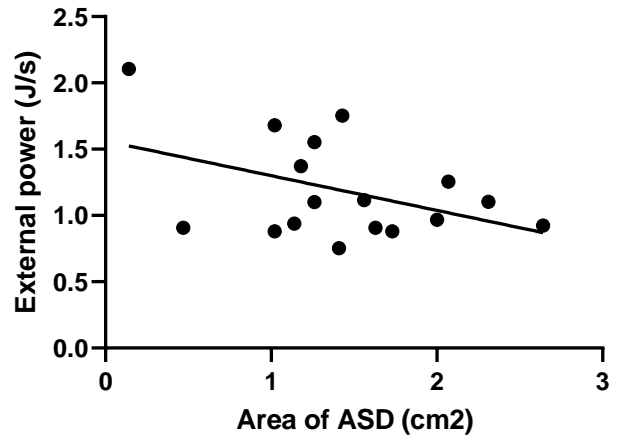

**Contractility**

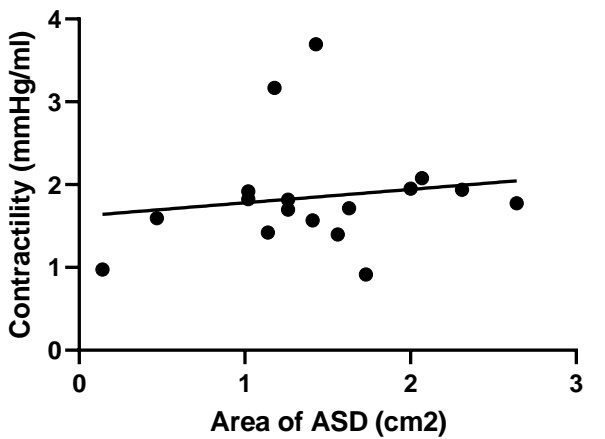

**Energy per ejected volume**

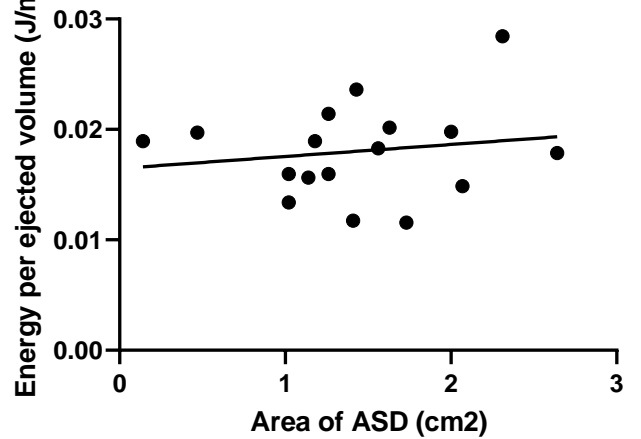

Supplement: CPF-42-422-s004.pdf [file CPF-42-422-s004.pdf]
