# Supplementary material for: Haemodynamic left‐ventricular changes during dobutamine stress in patients with atrial septal defect assessed with magnetic resonance imaging‐based pressure–volume loops
Source: PubMed Central journal article supplement (PMC9796342; doi:10.1111/cpf.12781), 2022-07-26
Supplement: CPF-42-422-s005.pdf [file CPF-42-422-s005.pdf]

Table S1. Younger than 65 years. ASD 42±12 years, Controls 35±13 years, p=0.10

| Mean±SD                            | ASD at rest<br>n=14 | ASD at stress<br>n=13 | Controls<br>n=16 | Controls at stress<br>n=16 |
|------------------------------------|---------------------|-----------------------|------------------|----------------------------|
| Stroke work (J)                    | 0.9±0.3 ***         | 1.2±0.5 **            | 1.3±0.2          | 1.7±0.4 ††††               |
| Potential energy (J)               | 0.4±0.2 *           | 0.4±0.2               | 0.5±0.1          | 0.4±0.2 ††                 |
| Stroke work + Potential energy (J) | 1.2±0.5 ***         | 1.4±0.7 **            | 1.8±0.4          | 2.1±0.5 ††                 |
| Ventricular efficiency (%)         | 70±6                | 77±10 †               | 70±4             | 82±4 ††††                  |
| External power (J/s)               | 1.1±0.4 *           | 2.4±0.8 ***††††       | 1.5±0.4          | 3.7±0.6 ††††               |
| Contractility, Emax (mmHg/ml)      | 1.5±0.3 **          | 2.6±0.6 *††††         | 1.1±0.2          | 2.0±0.5 ††††               |
| Arterial Elastance, Ea (mmHg/ml)   | 1.4±0.6 *           | 1.7±0.8 **            | 1.1±0.2          | 1.1±0.3                    |
| Ea/Emax                            | 1.0±0.3             | 0.7±0.3 ††            | 1.0±0.2          | 0.6±0.1 ††††               |
| Energy per ejected volume (mJ/ml)  | 17±4                | 19±4                  | 17±2             | 19±3                       |

ASD, atrial septal defect

\* p<0.05, \*\* p<0.01, \*\*\* p<0.001, \*\*\*\* p<0.0001 ASD at rest vs controls at rest or ASD at stress vs controls at stress

† p<0.05, †† p<0.01, ††† p<0.001, †††† p<0.0001 ASD or controls at rest vs stress
